# Supplementary material
Source: PubMed Central journal article supplement (PMC8715350)
Supplement: jama-e2121892-s003.pdf [file jama-e2121892-s003.pdf]

## Supplemental Online Content

Dargaville PA, Kamlin COF, Orsini F et al; OPTIMIST-A trial investigators. Effect of minimally invasive surfactant therapy vs sham treatment on death or bronchopulmonary dysplasia in preterm infants with respiratory distress syndrome: the OPTIMIST-A randomized clinical trial. *JAMA*. doi:10.1001/jama.2021.21892

**eTable 1.** Baseline characteristics by gestation strata

**eTable 2.** Primary outcome and its components: extended generalized linear model

**eTable 3.** Primary outcome and its components: as treated and per protocol analyses

**eTable 4.** Primary outcome and its components: gestation strata

**eTable 5.** Key clinical and safety outcomes: gestation strata

**eTable 6.** Secondary outcomes: gestation strata

**eTable 7.** Primary outcome and its components: subgroup analysis by FiO<sub>2</sub> at randomization

**eTable 8.** Key clinical and safety outcomes: subgroup analysis by FiO<sub>2</sub> at randomization

**eTable 9.** MIST intervention – procedural details and safety outcomes

**eTable 10.** Serious adverse events and cause of death

**eTable 11.** Clinical and procedural details by treatment group and survival to hospital discharge

**eFigure 1.** Requirement for intubation <72 h

**eFigure 2.** Primary outcome treatment effects in regional subgroups

**eReference**

This supplemental material has been provided by the authors to give readers additional information about their work.

**eTable 1. Baseline characteristics by gestation strata**

|                                                        |                                          | Gestation stratum<br>25-26 weeks |                            | Gestation stratum<br>27-28 weeks |                             |
|--------------------------------------------------------|------------------------------------------|----------------------------------|----------------------------|----------------------------------|-----------------------------|
|                                                        |                                          | MIST group<br>(N=90)             | Control<br>group<br>(N=87) | MIST group<br>(N=151)            | Control<br>group<br>(N=157) |
| <b>Gestation, weeks</b>                                |                                          | 26.0<br>(25.6–26.4)              | 26.1<br>(25.9–26.6)        | 28.0<br>(27.4–28.4)              | 27.9<br>(27.3–28.4)         |
| <b>Birth weight (g)</b>                                |                                          | 795 (161)                        | 804 (146)                  | 1009 (213)                       | 997 (219)                   |
| <b>Birth weight &lt;10<sup>th</sup> centile</b>        |                                          | 13 (14.4%)                       | 12 (13.8%)                 | 21 (13.9%)                       | 22 (14.0%)                  |
| <b>Female sex</b>                                      |                                          | 45 (50.0%)                       | 54 (62.1%)                 | 71 (47.0%)                       | 71 (45.2%)                  |
| <b>Male sex</b>                                        |                                          | 45 (50.0%)                       | 33 (37.9%)                 | 80 (53.0%)                       | 86 (54.8%)                  |
| <b>Plurality, birth order</b>                          | <b>Singleton</b>                         | 47 (52.2%)                       | 57 (65.5%)                 | 103 (68.2%)                      | 112 (71.3%)                 |
|                                                        | <b>First of multiples</b>                | 16 (17.8%)                       | 12 (13.8%)                 | 25 (16.6%)                       | 20 (12.7%)                  |
|                                                        | <b>Second or subsequent multiple</b>     | 27 (30.0%)                       | 18 (20.7%)                 | 23 (15.2%)                       | 25 (15.9%)                  |
| <b>Exposure to antenatal glucocorticoids</b>           | <b>2 or more doses prior to delivery</b> | 54 (60.0%)                       | 64 (73.6%)                 | 102 (67.5%)                      | 111 (70.7%)                 |
|                                                        | <b>1 dose prior to delivery</b>          | 31 (34.4%)                       | 21 (24.1%)                 | 32 (21.2%)                       | 29 (18.5%)                  |
|                                                        | <b>None</b>                              | 5 (5.6%)                         | 2 (2.3%)                   | 17 (11.3%)                       | 17 (10.8%)                  |
| <b>Delivery mode</b>                                   | <b>Vaginal delivery</b>                  | 25 (27.8%)                       | 22 (25.3%)                 | 20 (13.2%)                       | 30 (19.1%)                  |
|                                                        | <b>Cesarean delivery with labour</b>     | 40 (44.4%)                       | 30 (34.5%)                 | 56 (37.1%)                       | 52 (33.1%)                  |
|                                                        | <b>Cesarean delivery, no labour</b>      | 25 (27.8%)                       | 35 (40.2%)                 | 75 (49.7%)                       | 75 (47.8%)                  |
| <b>Apgar score at 5 min</b>                            |                                          | 8 (7–8)                          | 8 (7–9)                    | 8 (7–9)                          | 8 (7–9)                     |
| <b>Age at randomization (hrs)</b>                      |                                          | 2.6 (1.4)                        | 2.9 (1.4)                  | 3.0 (1.5)                        | 2.7 (1.5)                   |
| <b>CPAP level at randomization (cm H<sub>2</sub>O)</b> |                                          | 7 (6–8)                          | 7 (6–8)                    | 7 (6–8)                          | 7 (6–8)                     |
| <b>FiO<sub>2</sub> at randomization</b>                |                                          | 0.35<br>(0.30–0.40)              | 0.35<br>(0.30–0.40)        | 0.35<br>(0.30–0.39)              | 0.35<br>(0.30–0.39)         |
| <b>FiO<sub>2</sub> ≤0.35</b>                           |                                          | 52 (57.8%)                       | 54 (62.1%)                 | 100 (66.2%)                      | 96 (61.1%)                  |

n (%), mean (SD) or median (interquartile range). Abbreviations: CPAP, continuous positive airway pressure; MIST, minimally invasive surfactant therapy. Denominators for all characteristics, and number of observations for continuous variables, are as per column headers.

**eTable 2.** Primary outcome and its components: extended generalized linear model

| Outcome                                        | MIST group      | Control group   | Adjusted risk difference (%) (95% CI) <sup>a</sup> | Adjusted relative risk (95% CI) <sup>a</sup> |
|------------------------------------------------|-----------------|-----------------|----------------------------------------------------|----------------------------------------------|
| Death or BPD <sup>b</sup>                      | 105/241 (43.6%) | 121/244 (49.6%) | -6.4<br>(-14.0 to 1.2)                             | 0.87 (0.74–1.02)                             |
| Death prior to 36 weeks' PMA                   | 24/241 (10.0%)  | 19/244 (7.8%)   | 1.8<br>(-4.1 to 7.7)                               | 1.20 (0.58–2.46)                             |
| BPD <sup>b</sup> in survivors to 36 weeks' PMA | 81/217 (37.3%)  | 102/225 (45.3%) | -7.9<br>(-14.0 to -1.9)                            | 0.82 (0.71–0.95)                             |

n/N (%). Abbreviations: CI, confidence interval; MIST, minimally invasive surfactant therapy; PMA: postmenstrual age.  
<sup>a</sup>Adjusted for gestation strata and other covariates known to influence the primary outcome (birth weight <10th percentile, sex, mode of delivery, plurality, antenatal glucocorticoid exposure, and 5-minute Apgar score).  
<sup>b</sup>BPD: bronchopulmonary dysplasia (physiological definition) assessed at 36 weeks' postmenstrual age, and defined as: i) receiving mechanical respiratory support (mechanical ventilation / CPAP / nasal high flow  $\geq 2$  L/min); *or* ii) (if not receiving mechanical respiratory support): receiving oxygen with actual or effective  $\text{FiO}_2 \geq 0.30$ ; *or* iii) receiving oxygen with  $\text{FiO}_2 < 0.30$  and failed air trial; *or* iv) receiving oxygen with  $\text{FiO}_2 < 0.30$  and air trial not performed by physician request. See Methods for further details of physiological BPD assessment.

**eTable 3.** Primary outcome and its components: as treated and per protocol analyses

| Form of analysis                                                             | Outcome                                              | MIST group      | Control group   | Adjusted relative risk (95% CI) <sup>a</sup> |
|------------------------------------------------------------------------------|------------------------------------------------------|-----------------|-----------------|----------------------------------------------|
| <b>As treated<sup>b</sup></b><br><i>MIST N=243</i><br><i>Control N=240</i>   | <b>Death or BPD<sup>c</sup></b>                      | 106/243 (43.6%) | 118/240 (49.2%) | 0.88 (0.74–1.04)                             |
|                                                                              | <b>Death prior to 36 weeks' PMA</b>                  | 24/243 (9.9%)   | 19/240 (7.9%)   | 1.23 (0.60–2.53)                             |
|                                                                              | <b>BPD<sup>c</sup> in survivors to 36 weeks' PMA</b> | 82/219 (37.4%)  | 99/221 (44.8%)  | 0.84 (0.70–0.99)                             |
| <b>Per protocol<sup>d</sup></b><br><i>MIST N=234</i><br><i>Control N=235</i> | <b>Death or BPD<sup>c</sup></b>                      | 103/234 (44.0%) | 117/235 (49.8%) | 0.88 (0.74–1.04)                             |
|                                                                              | <b>Death prior to 36 weeks' PMA</b>                  | 24/234 (10.3%)  | 19/235 (8.1%)   | 1.26 (0.62–2.56)                             |
|                                                                              | <b>BPD<sup>c</sup> in survivors to 36 weeks' PMA</b> | 79/210 (37.6%)  | 98/216 (45.4%)  | 0.83 (0.70–0.99)                             |

n/N (%). Abbreviations: CI, confidence interval; MIST, minimally invasive surfactant therapy; PMA, postmenstrual age.

<sup>a</sup>Adjusted for gestation strata.

<sup>b</sup>As treated: analyzed by treatment received (see Figure 1 for details of inclusions and exclusions).

<sup>c</sup>BPD: bronchopulmonary dysplasia (physiological definition) assessed as per eTable 2.

<sup>d</sup>Per protocol: analysis of data from infants i) eligible for study entry based on review of Case Report Form data, ii) randomized according to the prescribed method, iii) receiving the intervention they were allocated to in the randomization, and iv) have primary outcome data available. Exclusions from per protocol analysis in the MIST group (n=8): allocated treatment not received, required immediate intubation (n=2); received treatment as per the control group (n=2); later found to be outborn and hence ineligible (n=2); allocated to MIST group but from incorrect randomization envelope (n=1); withdrawn and data not made available (n=1). Exclusions in the control group (n=9): received treatment as per the MIST group (n=6); later found to be >28 weeks gestation at birth and hence ineligible (n=1); allocated to control group but from incorrect randomization envelope (n=2).

**eTable 4.** Primary outcome and its components: gestation strata

| Outcome                                        | Gestation stratum | MIST group     | Control group  | Adjusted relative risk (95% CI) <sup>a</sup> | P value for interaction <sup>b</sup> | RR (95% CI) adjusted for gestation and covariates <sup>c</sup> |
|------------------------------------------------|-------------------|----------------|----------------|----------------------------------------------|--------------------------------------|----------------------------------------------------------------|
| Death or BPD <sup>d</sup>                      | 25-26 weeks       | 50/90 (55.6%)  | 53/87 (60.9%)  | 0.91 (0.71–1.16)                             | 0.78                                 | 0.89 (0.71–1.13)                                               |
|                                                | 27-28 weeks       | 55/151 (36.4%) | 68/157 (43.3%) | 0.86 (0.60–1.23)                             |                                      | 0.84 (0.61–1.16)                                               |
| Death prior to 36 weeks' PMA                   | 25-26 weeks       | 14/90 (15.6%)  | 6/87 (6.90%)   | 2.23 (0.90–5.52)                             | 0.01                                 | 1.95 (0.90–4.23)                                               |
|                                                | 27-28 weeks       | 10/151 (6.6%)  | 13/157 (8.3%)  | 0.79 (0.40–1.57)                             |                                      | 0.79 (0.40–1.56)                                               |
| BPD <sup>d</sup> in survivors to 36 weeks' PMA | 25-26 weeks       | 36/76 (47.4%)  | 47/81 (58.0%)  | 0.81 (0.59–1.12)                             | 0.95                                 | 0.80 (0.59–1.09)                                               |
|                                                | 27-28 weeks       | 45/141 (31.9%) | 55/144 (38.2%) | 0.87 (0.57–1.32)                             |                                      | 0.82 (0.56–1.19)                                               |

n/N (%). Abbreviations: CI, confidence interval; CPAP, continuous positive airway pressure; MIST, minimally invasive surfactant therapy; PMA, postmenstrual age; RR, relative risk.

<sup>a</sup>Adjusted for gestation.

<sup>b</sup>Interaction of gestation stratum with treatment allocation in the statistical model.

<sup>c</sup>Adjusted for gestation and covariates known to influence the primary outcome (see eTable 2).

<sup>d</sup>BPD: bronchopulmonary dysplasia (physiological definition) assessed as per eTable 2.

**eTable 5.** Key clinical and safety outcomes: gestation strata

| Outcome                                         | Gestation stratum | MIST group     | Control group   | Adjusted relative risk <sup>a</sup><br>(95% CI) | P value for interaction <sup>b</sup> |
|-------------------------------------------------|-------------------|----------------|-----------------|-------------------------------------------------|--------------------------------------|
| Air leak requiring drainage                     | 25-26 weeks       | 6/90 (6.7%)    | 13/87 (14.9%)   | 0.44 (0.19–1.00)                                | 0.96                                 |
|                                                 | 27-28 weeks       | 5/151 (3.3%)   | 12/157 (7.6%)   | 0.44 (0.18–1.07)                                |                                      |
| Need for intubation <72 h                       | 25-26 weeks       | 44/90 (48.9%)  | 63/87 (72.4%)   | 0.67 (0.52–0.86)                                | 0.013                                |
|                                                 | 27-28 weeks       | 44/151 (29.1%) | 113/157 (72.0%) | 0.41 (0.29–0.58)                                |                                      |
| Severe IVH – grade III or IV                    | 25-26 weeks       | 6/90 (6.7%)    | 14/87 (16.1%)   | 0.41 (0.15–1.09)                                | 0.083                                |
|                                                 | 27-28 weeks       | 12/151 (7.9%)  | 10/157 (6.4%)   | 1.27 (0.74–2.17)                                |                                      |
| Death or major morbidity <sup>c</sup>           | 25-26 weeks       | 53/90 (58.9%)  | 61/87 (70.1%)   | 0.84 (0.67–1.04)                                | 0.88                                 |
|                                                 | 27-28 weeks       | 63/151 (41.7%) | 75/157 (47.8%)  | 0.89 (0.61–1.30)                                |                                      |
| Death during first hospitalization (all causes) | 25-26 weeks       | 16/90 (17.8%)  | 7/87 (8.0%)     | 2.18 (0.97–4.88)                                | 0.047                                |
|                                                 | 27-28 weeks       | 12/151 (7.9%)  | 13/157 (8.3%)   | 0.95 (0.50–1.81)                                |                                      |
| Major morbidity <sup>c</sup> in survivors       | 25-26 weeks       | 37/74 (50.0%)  | 54/80 (67.5%)   | 0.74 (0.56–0.97)                                | 0.68                                 |
|                                                 | 27-28 weeks       | 51/139 (36.7%) | 62/144 (43.1%)  | 0.88 (0.56–1.37)                                |                                      |

n/N (%). Abbreviations: CI, confidence interval; IVH, intraventricular hemorrhage; MIST, minimally invasive surfactant therapy.

<sup>a</sup>Adjusted for gestation.

<sup>b</sup>Interaction of gestation stratum with treatment allocation in the statistical model.

<sup>c</sup>Death during first hospitalization, or major morbidity defined as any of: IVH grade III or IV, cystic periventricular leukomalacia, retinopathy of prematurity >stage II (assessed throughout hospitalization), physiological bronchopulmonary dysplasia (at 36 weeks PMA).<sup>1</sup>

**eTable 6.** Secondary outcomes: gestation strata

| BINARY OUTCOMES                                                        | Gestation stratum 25-26 weeks |                      |                                              | Gestation stratum 27-28 weeks |                       |                                              |
|------------------------------------------------------------------------|-------------------------------|----------------------|----------------------------------------------|-------------------------------|-----------------------|----------------------------------------------|
|                                                                        | MIST group (N=90)             | Control group (N=87) | Adjusted relative risk (95% CI) <sup>a</sup> | MIST group (N=151)            | Control group (N=157) | Adjusted relative risk (95% CI) <sup>a</sup> |
| <i>Respiratory</i>                                                     |                               |                      |                                              |                               |                       |                                              |
| Intubation at any time                                                 | 65 (72.2%)                    | 74 (85.1%)           | 0.85 (0.75–0.95)                             | 67 (44.4%)                    | 124 (79.0%)           | 0.57 (0.40–0.80)                             |
| Requirement for surfactant via endotracheal tube                       | 35 (38.9%)                    | 57 (65.5%)           | 0.59 (0.43–0.81)                             | 44 (29.1%)                    | 110 (70.1%)           | 0.42 (0.30–0.59)                             |
| Pulmonary hemorrhage                                                   | 10 (11.1%)                    | 7 (8.0%)             | 1.37 (0.61–3.05)                             | 7 (4.6%)                      | 8 (5.1%)              | 0.95 (0.41–2.20)                             |
| Oxygen therapy at day 28 (in survivors to day 28)                      | 75/78 (96.2%)                 | 76/81 (93.8%)        | 1.02 (0.95–1.10)                             | 97/143 (67.8%)                | 107/146 (73.3%)       | 0.94 (0.81–1.10)                             |
| BPD (clinical definition) <sup>b</sup> , in survivors to 36 weeks' PMA | 40/76 (52.6%)                 | 48/81 (59.3%)        | 0.89 (0.66–1.18)                             | 54/141 (38.3%)                | 59/144 (41.0%)        | 0.96 (0.67–1.39)                             |
| Mechanical respiratory support at 36 weeks' PMA (in survivors)         | 26/76 (34.2%)                 | 26/81 (32.1%)        | 1.06 (0.69–1.64)                             | 27/141 (19.1%)                | 41/144 (28.5%)        | 0.70 (0.43–1.15)                             |
| Oxygen therapy at home <sup>c</sup>                                    | 11/72 (15.3%)                 | 25/80 (31.3%)        | 0.49 (0.30–0.79)                             | 20/139 (14.4%)                | 24/144 (16.7%)        | 0.92 (0.60–1.42)                             |
| <i>Non-respiratory</i>                                                 |                               |                      |                                              |                               |                       |                                              |
| PDA requiring medical therapy                                          | 40 (44.4%)                    | 53 (60.9%)           | 0.73 (0.58–0.91)                             | 45 (29.8%)                    | 58 (36.9%)            | 0.82 (0.55–1.23)                             |
| Late onset sepsis                                                      | 27 (30.0%)                    | 28 (32.2%)           | 0.93 (0.62–1.38)                             | 28 (18.5%)                    | 35 (22.3%)            | 0.83 (0.43–1.64)                             |
| IVH any grade                                                          | 44 (48.9%)                    | 48 (55.2%)           | 0.88 (0.63–1.24)                             | 41 (27.2%)                    | 43 (27.4%)            | 0.99 (0.66–1.48)                             |
| Cystic periventricular leukomalacia                                    | 1 (1.1%)                      | 7 (8.0%)             | 0.14 (0.02–0.92)                             | 5 (3.3%)                      | 9 (5.7%)              | 0.59 (0.23–1.48)                             |
| NEC (modified Bell stage 2 or greater)                                 | 5 (5.6%)                      | 5 (5.7%)             | 0.96 (0.32–2.86)                             | 7 (4.6%)                      | 12 (7.6%)             | 0.60 (0.22–1.64)                             |
| NEC requiring surgery                                                  | 3 (3.3%)                      | 3 (3.4%)             | 0.95 (0.26–3.50)                             | 1 (0.7%)                      | 2 (1.3%)              | 0.50 (0.05–5.53)                             |
| Spontaneous intestinal perforation                                     | 3 (3.3%)                      | 6 (6.9%)             | 0.47 (0.10–2.18)                             | 1 (0.7%)                      | 0 (0%)                | Not estimable                                |



|                                                                               | Gestation stratum 25-26 weeks |                                 |                                                        | Gestation stratum 27-28 weeks |                                  |                                                        |
|-------------------------------------------------------------------------------|-------------------------------|---------------------------------|--------------------------------------------------------|-------------------------------|----------------------------------|--------------------------------------------------------|
| <b>BINARY OUTCOMES</b>                                                        | <b>MIST group<br/>(N=90)</b>  | <b>Control group<br/>(N=87)</b> | <b>Adjusted relative<br/>risk (95% CI)<sup>a</sup></b> | <b>MIST group<br/>(N=151)</b> | <b>Control group<br/>(N=157)</b> | <b>Adjusted relative<br/>risk (95% CI)<sup>a</sup></b> |
| <b>Retinopathy of prematurity<br/>(stage 3 or greater)</b>                    | 13 (14.4%)                    | 16 (18.4%)                      | 0.78 (0.40–1.49)                                       | 6 (4.0%)                      | 8 (5.1%)                         | 0.85 (0.27–2.75)                                       |
| <b>Total number of surfactant doses<sup>e</sup></b>                           | 1 (1–2)                       | 1 (0–1)                         | N/A                                                    | 1 (1–2)                       | 1 (0–1)                          | N/A                                                    |
| <b>Days of mechanical ventilation via<br/>endotracheal tube<sup>f,g</sup></b> | 4 (0–20)                      | 7 (2–23)                        | -4.37<br>(-8.68 to -0.07)                              | 0 (0–4)                       | 2 (0–8)                          | -1.25<br>(-2.17 to -0.33)                              |
| <b>Days of CPAP<sup>f,g</sup></b>                                             | 25 (10–40)                    | 31 (19–44)                      | -6.25<br>(-13.28 to 0.78)                              | 13 (6–29)                     | 17 (6–30)                        | -2.92<br>(-7.13 to 1.30)                               |
| <b>Days of mechanical ventilation<br/>+CPAP<sup>f,g</sup></b>                 | 38 (20–56)                    | 44 (32–60)                      | -9.50<br>(-15.53 to -3.47)                             | 14 (7–36)                     | 23 (9–39)                        | -5.25<br>(-11.48 to 0.98)                              |
| <b>Days of all mechanical respiratory<br/>support<sup>f,g</sup></b>           | 53 (31–71)                    | 58 (40–74)                      | -5.04<br>(-14.39 to 4.31)                              | 34 (12–50)                    | 40 (16–56)                       | -7.08<br>(-14.73 to 0.57)                              |
| <b>Days to regain birth weight<sup>h,i</sup></b>                              | 9.9 (4.6)                     | 11.1 (5.5)                      | -1.20<br>(-2.25 to -0.16)                              | 10.2 (4.0)                    | 10.4 (4.8)                       | -0.19<br>(-1.01 to 0.63)                               |
| <b>Days of hospitalization<sup>f,j</sup></b>                                  | 92 (57)                       | 96 (39)                         | -4.86<br>(-19.77 to 10.06)                             | 73 (39)                       | 76 (36)                          | -2.20<br>(-9.72 to 5.32)                               |

n (%), n/N (%), mean (standard deviation) or median (interquartile range). Denominators for all outcomes, and number of observations for continuous variables, are as per column headers unless otherwise indicated. Abbreviations: BPD, bronchopulmonary dysplasia; CPAP, continuous positive airway pressure; IVH, intraventricular hemorrhage; MIST, minimally invasive surfactant therapy; NEC, necrotizing enterocolitis; PDA, patent ductus arteriosus; PMA, postmenstrual age.

<sup>a</sup>Adjusted for gestation.

<sup>b</sup>Need for oxygen and/or mechanical respiratory support (mechanical ventilation / CPAP / nasal high flow  $\geq 2$  L/min) at 36 weeks' postmenstrual age.

<sup>c</sup>Missing data for two infants in the 25-26 weeks' gestation stratum of the MIST group.

<sup>d</sup>Mean difference or difference in medians for severely skewed continuous outcomes, adjusted for gestation.

<sup>e</sup>Including dose, if given, during the trial intervention.

<sup>f</sup>25-26 weeks' gestation: N=89 for MIST group, N=87 for control group. <sup>g</sup>27-28 weeks' gestation: N=151 for MIST group, N=157 for control group.

<sup>h</sup>25-26 weeks' gestation: N=82 for MIST group, N=84 for control group. <sup>i</sup>27-28 weeks' gestation: N=149 for MIST group, N=152 for control group.

<sup>j</sup>27-28 weeks' gestation: N=149 for MIST group, N=156 for control group.

**eTable 7.** Primary outcome and its components: subgroup analysis by FiO<sub>2</sub> at randomization

| Outcome                                        | Subgroups based on FiO <sub>2</sub> at randomization <sup>a</sup> | MIST group     | Control group  | Adjusted relative risk <sup>b</sup> (95% CI) | P value for interaction <sup>c</sup> |
|------------------------------------------------|-------------------------------------------------------------------|----------------|----------------|----------------------------------------------|--------------------------------------|
| Death or BPD <sup>d</sup>                      | FiO <sub>2</sub> 0.30-0.35                                        | 58/152 (38.2%) | 69/150 (46.0%) | 0.84 (0.64–1.10)                             | 0.59                                 |
|                                                | FiO <sub>2</sub> >0.35                                            | 47/89 (52.8%)  | 52/94 (55.3%)  | 0.94 (0.76–1.17)                             |                                      |
| Death prior to 36 weeks' PMA                   | FiO <sub>2</sub> 0.30-0.35                                        | 14/152 (9.2%)  | 10/150 (6.7%)  | 1.39 (0.68–2.83)                             | 0.59                                 |
|                                                | FiO <sub>2</sub> >0.35                                            | 10/89 (11.2%)  | 9/94 (9.6%)    | 1.12 (0.47–2.68)                             |                                      |
| BPD <sup>d</sup> in survivors to 36 weeks' PMA | FiO <sub>2</sub> 0.30-0.35                                        | 44/138 (31.9%) | 59/140 (42.1%) | 0.78 (0.58–1.06)                             | 0.50                                 |
|                                                | FiO <sub>2</sub> >0.35                                            | 37/79 (46.8%)  | 43/85 (50.6%)  | 0.92 (0.71–1.17)                             |                                      |

n/N (%). Abbreviations: CI, confidence interval; MIST, minimally invasive surfactant therapy; PMA, postmenstrual age.

<sup>a</sup>Age at randomization for subgroup with FiO<sub>2</sub> 0.30-0.35: MIST group: mean 3.0 h (standard deviation 1.5 h); control group 2.9 (1.6) h. Age at randomization for subgroup with FiO<sub>2</sub> >0.35: MIST group: 2.6 (1.3) h; control group 2.6 (1.3) h.

<sup>b</sup>Adjusted for gestation strata.

<sup>c</sup>Interaction of FiO<sub>2</sub> subgroup with treatment allocation in the statistical model.

<sup>d</sup>BPD: bronchopulmonary dysplasia (physiological definition) assessed as per eTable 2.

**eTable 8.** Key clinical and safety outcomes: subgroup analysis by FiO<sub>2</sub> at randomization

| Outcome                                         | Subgroups based on FiO <sub>2</sub> at randomization <sup>a</sup> | MIST group     | Control group  | Adjusted relative risk <sup>b</sup> (95% CI) | P value for interaction <sup>c</sup> |
|-------------------------------------------------|-------------------------------------------------------------------|----------------|----------------|----------------------------------------------|--------------------------------------|
| Air leak requiring drainage                     | FiO <sub>2</sub> 0.30-0.35                                        | 4/152 (2.6%)   | 14/150 (9.3%)  | 0.29 (0.11–0.79)                             | 0.20                                 |
|                                                 | FiO <sub>2</sub> >0.35                                            | 7/89 (7.9%)    | 11/94 (11.7%)  | 0.67 (0.32–1.40)                             |                                      |
| Need for intubation <72 h                       | FiO <sub>2</sub> 0.30-0.35                                        | 47/152 (30.9%) | 93/150 (62.0%) | 0.50 (0.37–0.68)                             | 0.86                                 |
|                                                 | FiO <sub>2</sub> >0.35                                            | 41/89 (46.1%)  | 83/94 (88.3%)  | 41/89 (46.1%)                                |                                      |
| Severe IVH - grade III or IV                    | FiO <sub>2</sub> 0.30-0.35                                        | 12/152 (7.9%)  | 14/150 (9.3%)  | 12/152 (7.9%)                                | 0.52                                 |
|                                                 | FiO <sub>2</sub> >0.35                                            | 6/89 (6.7%)    | 10/94 (10.6%)  | 0.60 (0.27–1.32)                             |                                      |
| Death or major morbidity <sup>d</sup>           | FiO <sub>2</sub> 0.30-0.35                                        | 69/152 (45.4%) | 81/150 (54.0%) | 0.85 (0.64–1.13)                             | 0.83                                 |
|                                                 | FiO <sub>2</sub> >0.35                                            | 47/89 (52.8%)  | 55/94 (58.5%)  | 0.89 (0.72–1.10)                             |                                      |
| Death during first hospitalization (all causes) | FiO <sub>2</sub> 0.30-0.35                                        | 17/152 (11.2%) | 11/150 (7.3%)  | 1.53 (0.84–2.81)                             | 0.56                                 |
|                                                 | FiO <sub>2</sub> >0.35                                            | 11/89 (12.4%)  | 9/94 (9.6%)    | 1.23 (0.51–2.96)                             |                                      |
| Major morbidity in survivors                    | FiO <sub>2</sub> 0.30-0.35                                        | 52/135 (38.5%) | 70/139 (50.4%) | 0.78 (0.56–1.10)                             | 0.75                                 |
|                                                 | FiO <sub>2</sub> >0.35                                            | 36/78 (46.2%)  | 46/85 (54.1%)  | 0.84 (0.66–1.07)                             |                                      |

n/N (%). Abbreviations: CI, confidence interval; IVH, intraventricular hemorrhage; MIST, minimally invasive surfactant therapy.

<sup>a</sup>See eTable 7 footnote for time of randomization of these subgroups.

<sup>b</sup>Adjusted for gestation strata.

<sup>c</sup>Interaction of FiO<sub>2</sub> subgroup with treatment allocation in the statistical model.

<sup>d</sup>Death or major morbidity defined as per eTable 5.

**eTable 9.** MIST intervention – procedural details and safety outcomes

|                                                              |                 | <b>25-26 weeks gestation (N=92)</b> | <b>27-28 weeks gestation (N=151)</b> | <b>All gestations (N=243)</b> |
|--------------------------------------------------------------|-----------------|-------------------------------------|--------------------------------------|-------------------------------|
| <b>Surfactant successfully administered<sup>a</sup></b>      |                 | 92/92 (100%)                        | 151/151 (100%)                       | 243/243 (100%)                |
| <b>Premedication used</b>                                    | <b>None</b>     | 33/81 (40.7%)                       | 64/144 (44.4%)                       | 97/225 (43.1%)                |
|                                                              | <b>Atropine</b> | 4/81 (4.9%)                         | 3/144 (2.1%)                         | 7/225 (3.1%)                  |
|                                                              | <b>Sucrose</b>  | 42/81 (51.9%)                       | 75/144 (52.1%)                       | 117/225 (52.0%)               |
|                                                              | <b>Other</b>    | 2/81 (2.5%)                         | 2/144 (1.4%)                         | 4/225 (1.8%)                  |
| <b>Number of catheterization attempts</b>                    | <b>1</b>        | 65/88 (73.9%)                       | 117/151 (77.5%)                      | 182/239 (76.2%)               |
|                                                              | <b>2</b>        | 17/88 (19.3%)                       | 28/151 (18.5%)                       | 45/239 (18.8%)                |
|                                                              | <b>3</b>        | 5/88 (5.7%)                         | 5/151 (3.3%)                         | 10/239 (4.2%)                 |
|                                                              | <b>4</b>        | 1/88 (1.1%)                         | 1/151 (0.7%)                         | 2/239 (0.8%)                  |
| <b>Surfactant dose administered (mg/kg)</b>                  |                 | 200 (198–203)                       | 201 (199–203)                        | 200 (198–203)                 |
| <b>Surfactant reflux observed</b>                            |                 | 33/92 (35.9%)                       | 60/149 (40.3%)                       | 93/241 (38.6%) <sup>b</sup>   |
| <b>Undue discomfort<sup>c</sup></b>                          |                 | 5/91 (5.5%)                         | 19/147 (12.9%)                       | 24/238 (10.1%)                |
| <b>Bradycardia (heart rate &lt;100 bpm)</b>                  |                 | 55/90 (61.1%)                       | 57/151 (37.7%)                       | 112/241 (46.5%)               |
| <b>Bradycardia &gt;10 s</b>                                  |                 | 36/90 (40.0%)                       | 40/151 (26.5%)                       | 76/241 (31.5%)                |
| <b>Hypoxemia (SpO<sub>2</sub> &lt;80%)</b>                   |                 | 64/91 (70.3%)                       | 103/150 (68.7%)                      | 167/241 (69.3%)               |
| <b>Hypoxemia &gt;30 s</b>                                    |                 | 37/91 (40.7%)                       | 65/150 (43.3%)                       | 102/241 (42.3%)               |
| <b>Positive pressure inflations required</b>                 |                 | 15/88 (17.0%)                       | 19/151 (12.6%)                       | 34/239 (14.2%)                |
| <b>Duration positive pressure inflations (s)<sup>d</sup></b> |                 | 30 (20–60)                          | 30 (20–60)                           | 30 (20–60)                    |
| <b>Procedure duration (min)</b>                              |                 | 5.0 (4.0–8.0)                       | 5.0 (4.0–7.0)                        | 5.0 (4.0–8.0)                 |
| <b>Emergent intubation</b>                                   |                 | 1/92 (1.1%)                         | 0/151 (0%)                           | 1/243 (0.4%)                  |
| <b>Intubation within 1 h</b>                                 |                 | 3/92 (3.3%)                         | 1/151 (0.7%)                         | 4/243 (1.6%)                  |
| <b>ΔFiO<sub>2</sub><sup>e</sup></b>                          |                 | -0.13 (-0.18 to -0.09)              | -0.10 (-0.15 to -0.08)               | -0.10 (-0.17 to -0.08)        |
| <b>Treatment ineffective<sup>f</sup></b>                     |                 | 10/91 (11.0%)                       | 19/150 (12.7%)                       | 29/241 (12.0%)                |
| <b>ΔCO<sub>2</sub> (mm Hg)<sup>g</sup></b>                   |                 | -6.0 (-12.0 to 2.0)                 | -7.0 (-12.5 to -0.5)                 | -6.5 (-12.0 to 0.0)           |

n/N (%) or median (interquartile range). As treated population (N=243). Abbreviations: MIST, minimally invasive surfactant therapy; SpO<sub>2</sub>, oxygen saturation.

<sup>a</sup>Successful proceduralists were neonatologists (55 individuals, 170 procedures), senior neonatal trainees (29 individuals, 62 procedures), respiratory therapists (7 individuals, 8 procedures) and neonatal nurse practitioners (3 individuals, 3 procedures). Standard laryngoscopy and videolaryngoscopy were used in 97% and 3% of MIST procedures, respectively. A 16G Angiocath was the conduit for surfactant administration in 90% of cases, with a LISAcath used in the remainder.

<sup>b</sup>Suction was required because of surfactant reflux in 25/93 cases (26.9%).

<sup>c</sup>Subjective determination of whether the infant suffered undue discomfort, reported by the Treatment Team nurse/respiratory therapist.

<sup>d</sup>Duration reported for infants receiving positive pressure inflations.

<sup>e</sup>FiO<sub>2</sub> at 4 h post-intervention minus FiO<sub>2</sub> pre-intervention, determined for infants not intubated at 4 h post-intervention. Paired observations available for 80 and 139 infants in the 25-26 weeks' and 27-28 weeks' gestation strata, respectively.

<sup>f</sup>Defined as no improvement in FiO<sub>2</sub> at 4 h post-intervention (infant still supported with CPAP), or intubated <4 h post-intervention with FiO<sub>2</sub> above intubation threshold.

<sup>g</sup>PCO<sub>2</sub> at 4 h post-intervention minus PCO<sub>2</sub> pre-intervention, determined for infants not intubated at 4 h post-intervention. Paired observations available for 62 and 104 infants in the 25-26 weeks' and 27-28 weeks' gestation strata, respectively.

**eTable 10.** Serious adverse events and cause of death

|                                                                                                    | MIST group<br>(N=241) | Control group<br>(N=244) | Total<br>(N=485) |    |
|----------------------------------------------------------------------------------------------------|-----------------------|--------------------------|------------------|----|
| <b>Serious adverse events</b>                                                                      |                       |                          |                  |    |
| Infants experiencing an SAE                                                                        | 25 (10.3%)            | 27 (11.1%)               | 52 (10.7%)       |    |
| Total number of serious adverse events                                                             | 26                    | 28                       | 54               |    |
| Unexpected death                                                                                   | 7                     | 6                        | 13               |    |
| Life-threatening deterioration                                                                     | 14                    | 16                       | 30               |    |
| Medical occurrence that will prolong hospitalization                                               | 1                     | 3                        | 4                |    |
| Medical occurrence that is likely to result in persistent and significant disability or incapacity | 1                     | 1                        | 2                |    |
| Medical occurrence that could have become serious if untreated                                     | 2                     | 4                        | 6                |    |
| Relationship of the SAE to the infants enrolment in the study as determined by clinicians          | Unrelated             | 24                       | 28               | 52 |
|                                                                                                    | Possibly related      | 2                        | 0                | 2  |
| SAE occurring at the time of the study intervention                                                | 0                     | 0                        | 0                |    |
| <b>Cause of death<sup>a</sup></b>                                                                  |                       |                          |                  |    |
| Severe RDS                                                                                         | 2                     | 1                        | 3                |    |
| Pulmonary hemorrhage                                                                               | 4                     | 3                        | 7                |    |
| Intractable heart failure secondary to PDA                                                         | 2                     | 0                        | 2                |    |
| Chronic lung disease                                                                               | 2                     | 0                        | 2                |    |
| Severe intraventricular hemorrhage                                                                 | 5                     | 5                        | 10               |    |
| Septicemia                                                                                         | 7                     | 7                        | 14               |    |
| Pneumonia                                                                                          | 1                     | 0                        | 1                |    |
| Meningitis                                                                                         | 1                     | 0                        | 1                |    |
| NEC/SIP                                                                                            | 3                     | 2                        | 5                |    |
| Other                                                                                              | 1 <sup>b</sup>        | 2 <sup>c</sup>           | 3                |    |

n or n (%). Abbreviations: MIST, minimally invasive surfactant therapy; NEC, necrotizing enterocolitis; PDA, patent ductus arteriosus; RDS, respiratory distress syndrome; SAE, serious adverse event; SIP, spontaneous intestinal perforation.

<sup>a</sup>Age at death was 0-6 days: MIST 11, control 9, total 20; 7 days to 36 weeks' postmenstrual age: MIST 13, control 10, total 23; beyond 36 weeks' postmenstrual age: MIST 4, control 1, total 5.

<sup>b</sup>Chronic respiratory failure with suspected cystic fibrosis.

<sup>c</sup>Renal failure (n=2).

**eTable 11.** Clinical and procedural details by treatment group and survival to hospital discharge

|                                                   | MIST group             |                        | Control group    |                  |
|---------------------------------------------------|------------------------|------------------------|------------------|------------------|
|                                                   | Survived (N=215)       | Died (N=28)            | Survived (N=221) | Died (N=20)      |
| CPAP level pre-intervention (cm H <sub>2</sub> O) | 7 (6–8)                | 6 (6–7)                | 7 (6–8)          | 6 (6–7)          |
| FiO <sub>2</sub> pre-intervention                 | 0.35 (0.31–0.40)       | 0.35 (0.33–0.40)       | 0.35 (0.33–0.40) | 0.37 (0.32–0.42) |
| Trachea catheterized at first attempt             | 163/215 (75.8%)        | 19/24 (79.2%)          | N/A              | N/A              |
| Bradycardia >10 s during intervention             | 68/214 (31.8%)         | 8/27 (29.6%)           | N/A              | N/A              |
| Hypoxemia >30 s during intervention               | 93/214 (43.5%)         | 9/27 (33.3%)           | N/A              | N/A              |
| Positive pressure inflations required             | 29/212 (13.7%)         | 5/27 (18.5%)           | N/A              | N/A              |
| FiO <sub>2</sub> post-intervention                | 0.30 (0.25–0.36)       | 0.32 (0.28–0.38)       | 0.35 (0.30–0.40) | 0.38 (0.30–0.42) |
| ΔFiO <sub>2</sub> <sup>a</sup>                    | -0.11 (-0.17 to -0.09) | -0.09 (-0.11 to -0.05) | N/A              | N/A              |
| Treatment ineffective <sup>b</sup>                | 34/214 (15.9%)         | 2/27 (7.4%)            | N/A              | N/A              |
| Intubated <4 h post-intervention                  | 20/215 (9.3%)          | 2/28 (7.1%)            | 66/221 (29.9%)   | 8/20 (40.0%)     |
| Intubated <24 h of age                            | 41/215 (19.1%)         | 5/28 (17.9%)           | 126/221 (57.0%)  | 13/20 (65.0%)    |
| Intubation <72 h of age                           | 66/215 (30.7%)         | 20/28 (71.4%)          | 161/221 (72.9%)  | 16/20 (80.0%)    |

n/N (%) or median (interquartile range). As treated population. Abbreviations: CPAP, continuous positive airway pressure; MIST, minimally invasive surfactant therapy.

<sup>a</sup>FiO<sub>2</sub> at 4 hrs post-intervention minus FiO<sub>2</sub> pre-intervention, determined for infants not intubated at 4 h post-intervention.

<sup>b</sup>Defined as no improvement in FiO<sub>2</sub> at 4 h post-intervention (infant still supported with CPAP), or intubated <4h post-intervention with FiO<sub>2</sub> above intubation threshold.

**eFigure 1. Requirement for intubation <72 h**

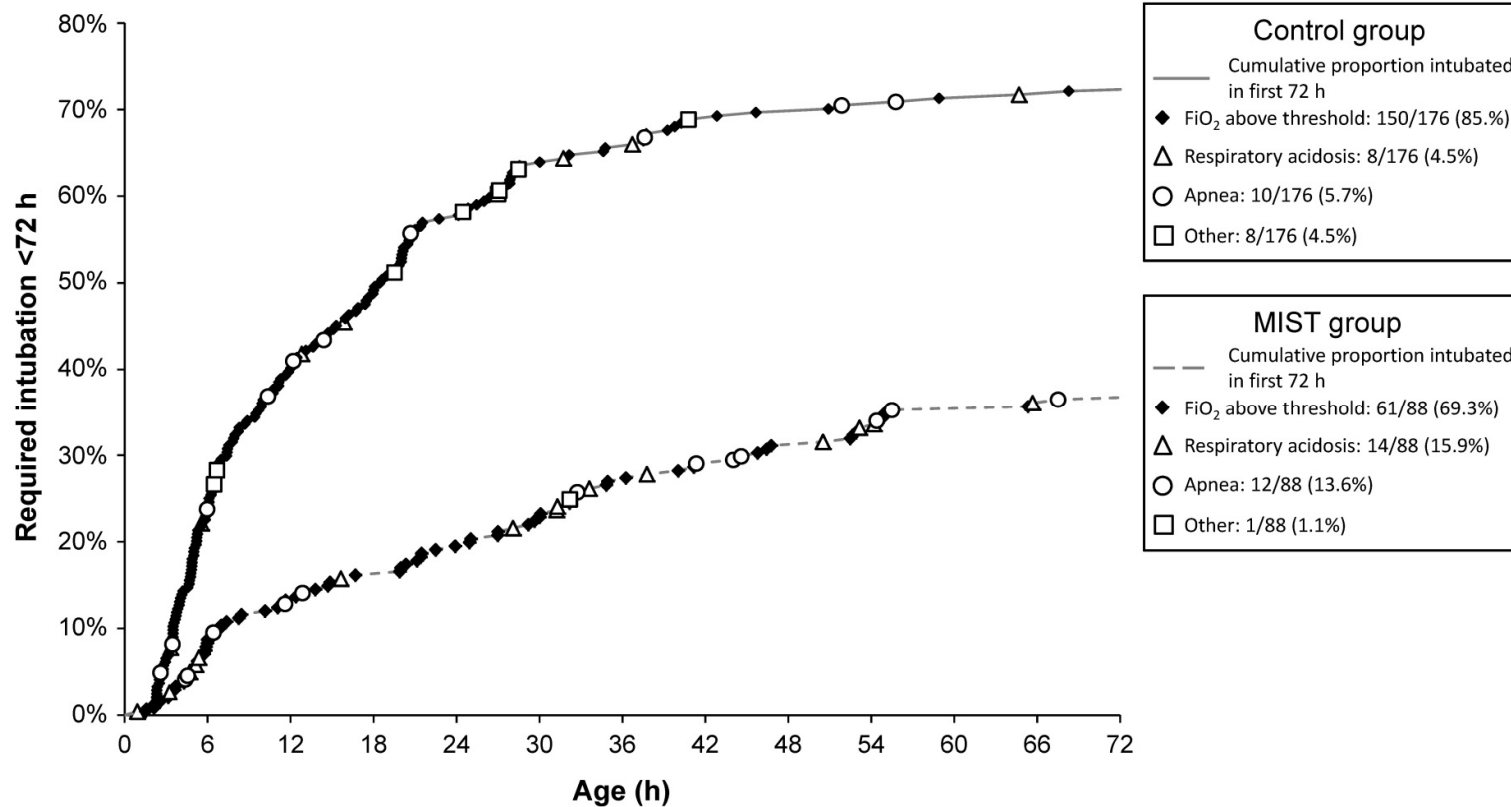

*Number remaining unintubated*

|         |     |     |     |     |     |     |     |     |     |     |     |     |     |
|---------|-----|-----|-----|-----|-----|-----|-----|-----|-----|-----|-----|-----|-----|
| MIST    | 241 | 220 | 209 | 202 | 194 | 186 | 176 | 171 | 166 | 161 | 156 | 154 | 153 |
| Control | 244 | 186 | 146 | 124 | 104 | 89  | 84  | 76  | 74  | 72  | 70  | 69  | 68  |

Shows plots of cumulative proportion of infants requiring intubation over the course of the first 72 h. Abbreviation: MIST, minimally invasive surfactant therapy. Dashed line: MIST group; solid line: control group. Reason for intubation indicated in individual data points (see figure legends).

**eFigure 2.** Primary outcome treatment effects in regional subgroups

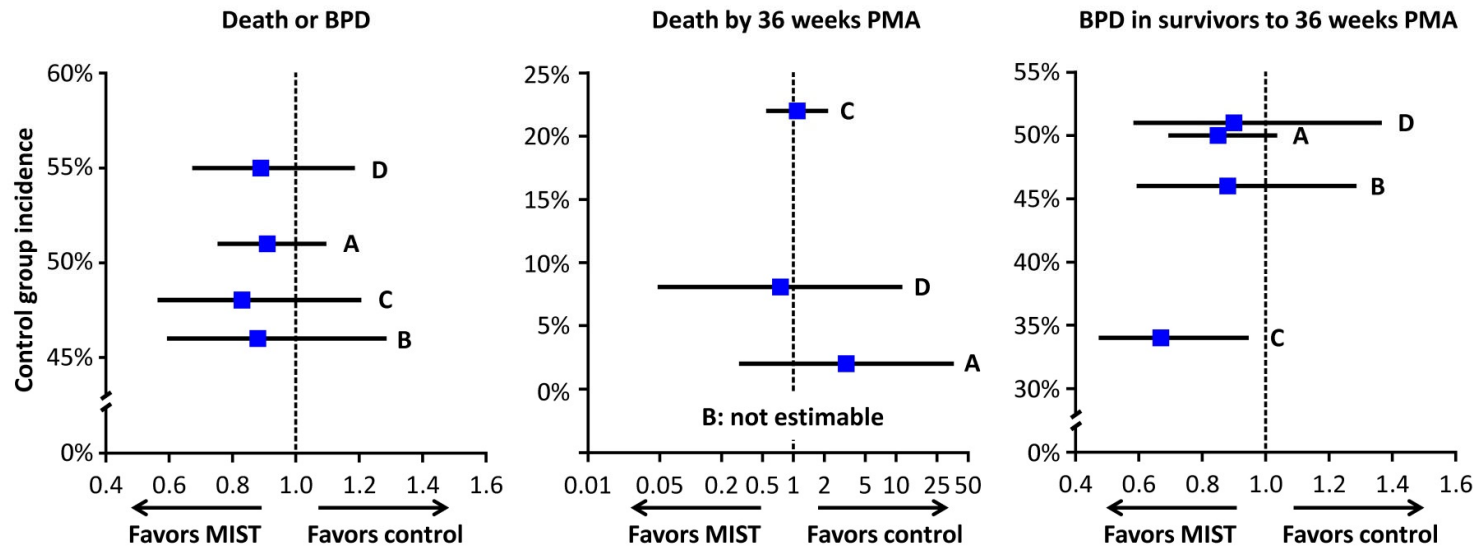

Relative risk and 95% confidence intervals for treatment effect (X-axis) plotted against outcome incidence in the control group (Y-axis) for de-identified study regions A-D. Abbreviations: BPD, bronchopulmonary dysplasia; MIST, minimally invasive surfactant therapy; PMA, postmenstrual age. Left panel: death or BPD; center panel: death by 36 weeks' PMA; right panel: BPD at 36 weeks' PMA. Relative risk of death not estimable in region B as there were no deaths in either study group by 36 weeks' PMA.  $P > .05$  for all tests of interaction between region and treatment allocation in the statistical model.



## eReference

1. Schmidt B, Asztalos EV, Roberts RS, Robertson CM, Sauve RS, Whitfield MF. Impact of bronchopulmonary dysplasia, brain injury, and severe retinopathy on the outcome of extremely low-birth-weight infants at 18 months: results from the trial of indomethacin prophylaxis in preterms. *JAMA* 2003;289(9):1124-1129.
