# Supplementary material
Source: PubMed Central journal article supplement (PMC8715350)
Supplement: jama-e2121892-s004.pdf [file jama-e2121892-s004.pdf]

\*Indicates required information. Only first name, last name, and suffix will appear in PubMed.

| <b>Group Name: OPTIMIST-A trial investigators</b> |                   |               |                         |                                                                |                             |                   |                   |
|---------------------------------------------------|-------------------|---------------|-------------------------|----------------------------------------------------------------|-----------------------------|-------------------|-------------------|
| <b>*First Name and Middle Initial(s)</b>          | <b>*Last Name</b> | <b>Suffix</b> | <b>Academic Degrees</b> | <b>Institution</b>                                             | <b>Location</b>             | <b>Role</b>       | <b>Subgroup</b>   |
| Brian A                                           | Darlow            |               | MD                      | University of Otago                                            | Dunedin, New Zealand        | Chair             | DSMC              |
| Michael                                           | Dunn              |               | MD                      | University of Toronto                                          | Toronto, Canada             | Member            | DSMC              |
| Amy                                               | Salter            |               | PhD                     | University of Adelaide                                         | Adelaide, Australia         | Member            | DSMC              |
| Karen                                             | Butterley         |               | RN                      | The Royal Hobart Hospital                                      | Hobart, Tasmania, Australia | Trial coordinator | Trial Coordinator |
| Nicky                                             | Stephens          |               | MPhil                   | Menzies Institute for Medical Research, University of Tasmania | Hobart, Tasmania, Australia | Trial coordinator | Trial Coordinator |
| Lizzy                                             | Reid              |               | MSc                     | Menzies Institute for Medical Research, University of Tasmania | Hobart, Tasmania, Australia | Trial coordinator | Trial Coordinator |
| Ross                                              | Dunn              |               | B App Sci               | Murdoch Children's Research Institute                          | Melbourne, Australia        | Data manager      | Data management   |
| Luke                                              | Stephens          |               | BSc (Hons)              | Murdoch Children's Research Institute                          | Melbourne, Australia        | Data manager      | Data management   |
| Tammy                                             | Matzolic          |               | RN                      | The Royal Hobart Hospital                                      | Hobart, Tasmania, Australia | Research nurse    |                   |
| Brenda                                            | Argus             |               |                         | The Royal Women's Hospital                                     | Melbourne, Australia        | Research nurse    |                   |
| Emily                                             | Twitchell         |               |                         | The Royal Women's Hospital                                     | Melbourne, Australia        | Research nurse    |                   |
| Joanna                                            | Barrotta          |               |                         | The Royal Women's Hospital                                     | Melbourne, Australia        | Research nurse    |                   |
| Elizabeth                                         | Noble             |               |                         | Mercy Hospital For Women                                       | Melbourne, Australia        | Research nurse    |                   |
| Kenneth                                           | Tan               |               |                         | Monash Children's Hospital                                     | Melbourne, Australia        | Co-investigator   |                   |
| Emma                                              | Yeomans           |               |                         | Monash Children's Hospital                                     | Melbourne, Australia        | Research nurse    |                   |
| Melissa                                           | Lai               |               |                         | Royal Brisbane and Women's Hospital                            | Brisbane, Australia         | Co-investigator   |                   |
| Pieter                                            | Koorts            |               |                         | Royal Brisbane and Women's Hospital                            | Brisbane, Australia         | Co-investigator   |                   |
| Margaret                                          | Broom             |               |                         | The Canberra Hospital                                          | Canberra, Australia         | Research nurse    |                   |
| Brenda                                            | Law               |               |                         | Royal Alexandra Hospital                                       | Edmonton, Canada            | Co-investigator   |                   |
| Po-Yin                                            | Cheung            |               |                         | Royal Alexandra Hospital                                       | Edmonton, Canada            | Co-investigator   |                   |
| Sylvia                                            | Van Os            |               |                         | Royal Alexandra Hospital                                       | Edmonton, Canada            | Research nurse    |                   |
| Caroline                                          | Fray              |               |                         | Royal Alexandra Hospital                                       | Edmonton, Canada            | Research nurse    |                   |

## Supplemental Online Content: Nonauthor Collaborators

\*Indicates required information. Only first name, last name, and suffix will appear in PubMed.

| *First Name and Middle Initial(s) | *Last Name        | Suffix | Academic Degrees | Institution                              | Location                   | Role            | Subgroup |
|-----------------------------------|-------------------|--------|------------------|------------------------------------------|----------------------------|-----------------|----------|
| Nicole                            | Huneault-Purney   |        |                  | The Ottawa Hospital                      | Ontario, Canada            | Co-investigator |          |
| Melissa                           | Faulkner          |        |                  | The Ottawa Hospital                      | Ontario, Canada            | Co-investigator |          |
| Chantal                           | Horth             |        |                  | The Ottawa Hospital                      | Ontario, Canada            | Research nurse  |          |
| Rebecca                           | Grimwood          |        |                  | The Ottawa Hospital                      | Ontario, Canada            | Research nurse  |          |
| A                                 | Riskin            |        |                  | Bnai Zion Medical Centre                 | Haifa, Israel              | Co-investigator |          |
| Tatiana                           | Kalinina          |        |                  | Bnai Zion Medical Centre                 | Haifa, Israel              | Research nurse  |          |
| C                                 | Tsafrir           |        |                  | Ziv Medical Centre                       | Tsfat, Israel              | Research nurse  |          |
| S                                 | Afuta             |        |                  | Ziv Medical Centre                       | Tsfat, Israel              | Research nurse  |          |
| Fanny                             | Timstut           |        |                  | Rambam Medical Centre,                   | Haifa, Israel              | Research nurse  |          |
| Sabine                            | Huth              |        |                  | Starship Child Health, Auckland Hospital | Auckland, New Zealand      | Research nurse  |          |
| Frances                           | McCaffrey         |        |                  | Dunedin Hospital                         | Dunedin, New Zealand       | Research nurse  |          |
| Helmut                            | Hummler           |        |                  | Sidra Medicine                           | Doha, Qatar                | Co-investigator |          |
| Samir                             | Gupta             |        |                  | Sidra Medicine                           | Doha, Qatar                | Co-investigator |          |
| Mary                              | Dinan             |        |                  | Sidra Medicine                           | Doha, Qatar                | Research nurse  |          |
| Miriam                            | Casiraghi         |        |                  | Sidra Medicine                           | Doha, Qatar                | Research nurse  |          |
| Yip Wai                           | Yan               |        |                  | KK Women's and Children's Hospital       | Singapore                  | Co-investigator |          |
| Krishna R                         | Gopagondanaha Ili |        |                  | KK Women's and Children's Hospital       | Singapore                  | Co-investigator |          |
| Suresh                            | Chandran          |        |                  | KK Women's and Children's Hospital       | Singapore                  | Co-investigator |          |
| Rowena                            | Dela Puerta       |        |                  | KK Women's and Children's Hospital       | Singapore                  | Research nurse  |          |
| Miha                              | Lučovnik          |        |                  | University Medical Centre Ljubljana      | Ljubljana, Slovenia        | Co-investigator |          |
| Vlasta L                          | Kurtovič          |        |                  | University Medical Centre Ljubljana      | Ljubljana, Slovenia        | Research nurse  |          |
| Annelies J                        | Olthuis           |        |                  | University Medical Centre Ljubljana      | Groningen, The Netherlands | Research nurse  |          |

## Supplemental Online Content: Nonauthor Collaborators

\*Indicates required information. Only first name, last name, and suffix will appear in PubMed.

| *First Name and Middle Initial(s) | *Last Name   | Suffix | Academic Degrees | Institution                                           | Location                   | Role              | Subgroup |
|-----------------------------------|--------------|--------|------------------|-------------------------------------------------------|----------------------------|-------------------|----------|
| Dyvonne H                         | Baptist      |        |                  | University Medical Centre Groningen                   | Groningen, The Netherlands | Research nurse    |          |
| Helene A                          | Bouma        |        |                  | University Medical Centre Ljubljana                   | Groningen, The Netherlands | Research nurse    |          |
| Mehmet                            | Büyüktiryaki |        |                  | Zekai Tahir Burak Maternity Teaching Hospital         | Ankara, Turkey             | Co-investigator   |          |
| Suzan                             | Sahin        |        |                  | Zekai Tahir Burak Maternity Teaching Hospital         | Ankara, Turkey             | Co-investigator   |          |
| Burcu                             | Cebeci       |        |                  | Kanuni Sultan Süleyman Training and Research Hospital | Istanbul, Turkey           | Co-investigator   |          |
| Sule                              | Ozdemir      |        |                  | Kanuni Sultan Süleyman Training and Research Hospital | Istanbul, Turkey           | Research nurse    |          |
| Aylin                             | Vantansever  |        |                  | Uludağ University Hospital                            | Bursa, Turkey              | Research nurse    |          |
| Lorna                             | McKay        |        |                  | Royal Hospital for Children                           | Glasgow, UK                | Research nurse    |          |
| Therese                           | McSorley     |        |                  | Royal Hospital for Children                           | Glasgow, UK                | Research nurse    |          |
| Philippa                          | Crowley      |        |                  | Princess Anne Hospital                                | Southampton, Hants, UK     | Research nurse    |          |
| Jenny                             | Pond         |        |                  | Princess Anne Hospital                                | Southampton, Hants, UK     | Research nurse    |          |
| Christie                          | Mellish      |        |                  | Princess Anne Hospital                                | Southampton, Hants, UK     | Research nurse    |          |
| Rachel M                          | Hayward      |        |                  | University Hospital of Wales                          | Cardiff, Wales             | Co-investigator   |          |
| Ian P                             | Morris       |        |                  | University Hospital of Wales                          | Cardiff, Wales             | Co-investigator   |          |
| Sian                              | Elliot       |        |                  | University Hospital of Wales                          | Cardiff, Wales             | Research nurse    |          |
| Deena-Shefali                     | Patel        |        |                  | Chelsea and Westminster Hospital NHS Foundation Trust | London, UK                 | Co-investigator   |          |
| Izabela                           | Andrzejewska |        |                  | Chelsea and Westminster Hospital NHS Foundation Trust | London, UK                 | Research nurse    |          |
| Amanda                            | Cook         |        |                  | Singleton Hospital                                    | Swansea, Wales             | Research nurse    |          |
| Sue                               | Wolf         |        |                  | Northshore University Health System                   | Chicago, USA               | Research nurse    |          |
| Micah                             | Tong         |        |                  | Kapi'olani Medical Centre for Women and Children      | Hawaii                     | Study coordinator |          |
| Rosanna                           | Ericksen     |        |                  | LAC + USC Medical Centre                              | Los Angeles, USA           | Research nurse    |          |
| Amanda                            | Logan        |        |                  | Cooper University Health Care                         | New Jersey, USA            | Research nurse    |          |
| Patricia                          | Niblack      |        |                  | Cooper University Health Care                         | New Jersey, USA            | Research nurse    |          |

Supplemental Online Content: Nonauthor Collaborators

\*Indicates required information. Only first name, last name, and suffix will appear in PubMed.

| <b>*First Name and Middle Initial(s)</b> | <b>*Last Name</b> | <b>Suffix</b> | <b>Academic Degrees</b> | <b>Institution</b>                  | <b>Location</b>   | <b>Role</b>     | <b>Subgroup</b> |
|------------------------------------------|-------------------|---------------|-------------------------|-------------------------------------|-------------------|-----------------|-----------------|
| Rosanna                                  | Ericksen          |               |                         | Good Samaritan Hospital             | Los Angeles, USA  | Research nurse  |                 |
| Zenaida R                                | Tauscher          |               |                         | Peyton Manning Children's Hospital, | Indianapolis, USA | Co-investigator |                 |
| Pamela                                   | Whitlow           |               |                         | Peyton Manning Children's Hospital, | Indianapolis, USA | Research nurse  |                 |
| Susan L                                  | Collins           |               |                         | WVU Medicine Children's Hospital    | Morgantown, USA   | Research nurse  |                 |
