# Supplementary material
Source: PubMed Central journal article supplement (PMC8715350)
Supplement: jama-e2121892-s005.pdf [file jama-e2121892-s005.pdf]

## Data Sharing Statement

Dargaville. Effect of Minimally Invasive Surfactant Therapy vs Sham Treatment on Death or Bronchopulmonary Dysplasia in Preterm Infants With Respiratory Distress Syndrome. *JAMA*. Published December 28, 2021. doi:10.1001/jama.2021.21892

### Data

**Data available:** Yes

**Data types:** Deidentified participant data

**How to access data:** Deidentified participant data will be shared upon reasonable request, addressed to the Chief Investigator at [peter.dargaville@ths.tas.gov.au](mailto:peter.dargaville@ths.tas.gov.au)

**When available:** With publication

### Supporting Documents

**Document types:** None

### Additional Information

**Who can access the data:** Researchers with an approved proposed use.

**Types of analyses:** An approved specified purpose.

**Mechanisms of data availability:** With a signed data access agreement.
